# Supplementary material for: The type I interferon signature in leukocyte subsets from peripheral blood of patients with early arthritis: a major contribution by granulocytes
Source: Springer Nature journal article supplement (doi:10.1186/s13075-016-1065-3), 2016-07-13
Supplement: MOESM1 [file 10370730]

*Table S1: Primers used for quantitative PCR*

| <b>Gene of interest</b> | <b>Forward primer</b>           | <b>Reverse primer</b>   |
|-------------------------|---------------------------------|-------------------------|
| GAPDH                   | GCCAGCCGAGCCACATC               | TGACCAGGCGCCAATAC       |
| RSAD2                   | GTGGTTCAGAATTATGGTGAGTATTT      | CCACGGCCAATAAGGACATT    |
| IFI44L                  | CCGAGCGGTATAGGATATATTCTGTT      | TGCTCCTTCTGCCCCATCTA    |
| MX1                     | TTCAGCACCTGATGGCCTATC           | GTACGTCTGGAGCATGAAGAAGT |
| IFNAR1                  | AAAATTGTCTGGGTGTCAGAATATTACTAG  | ACCAATCTGAGCTTTGCGAAA   |
| IFNAR2                  | TGTATACAATCATGAGTAAACCAGAAGATTT | TTGTGTTCCCGCTGAATCCT    |
